# Supplementary material for: Paper-based microfluidic system for tear electrolyte analysis
Source: PubMed Central journal article supplement (PMC5433427; doi:10.1039/c6lc01450j), 2017-02-16
Supplement: LC-017-C6LC01450J-s004.pdf [file LC-017-C6LC01450J-s004.pdf]

## SUPPORTING INFORMATION

# Paper-Based Microfluidic System for Tear Electrolyte Analysis

Ali K. Yetisen,<sup>§\*ab</sup> Nan Jiang,<sup>§abc</sup> Ali Tamayol,<sup>ab</sup> Guillermo U. Ruiz-Esparza,<sup>ab</sup> Yu Shrike Zhang,<sup>ab</sup> Sofia Medina-Pando,<sup>a</sup> Aditi Gupta,<sup>b</sup> James S Wolffsohn,<sup>d</sup> Haider Butt,<sup>e</sup> Ali Khademhosseini,<sup>abfg</sup> and Seok-Hyun Yun <sup>\*bh</sup>

<sup>a</sup> Biomaterials Innovation Research Center, Division of Biomedical Engineering, Brigham and Women's Hospital, Harvard Medical School, Cambridge, Massachusetts, 02139, USA;

<sup>b</sup> Harvard-MIT Division of Health Sciences and Technology, Massachusetts Institute of Technology, Cambridge, Massachusetts 02139, USA

<sup>c</sup> State Key Laboratory of Advanced Technology for Materials Synthesis and Processing, Wuhan University of Technology, 122, Luoshi Road, Wuhan, 430070, China

<sup>d</sup> Ophthalmic Research Group, School of Life and Health Sciences, Aston University, Aston Triangle, Birmingham B4 7ET, UK

<sup>e</sup> Nanotechnology Laboratory, School of Engineering, University of Birmingham, Birmingham B15 2TT, UK

<sup>f</sup> Department of Physics, King Abdulaziz University, Jeddah, 21589, Saudi Arabia;

<sup>g</sup> Department of Bioindustrial Technologies, College of Animal Bioscience and Technology, Konkuk University, Hwayang-dong, Gwangjin-gu, Seoul 143-701, Republic of Korea

<sup>h</sup> Harvard Medical School and Wellman Center for Photomedicine, Massachusetts General Hospital, 65 Landsdowne Street, Cambridge, Massachusetts 02139, USA

\* E-mail: [akyetisen@gmail.com](mailto:akyetisen@gmail.com), [syun@mgh.harvard.edu](mailto:syun@mgh.harvard.edu)

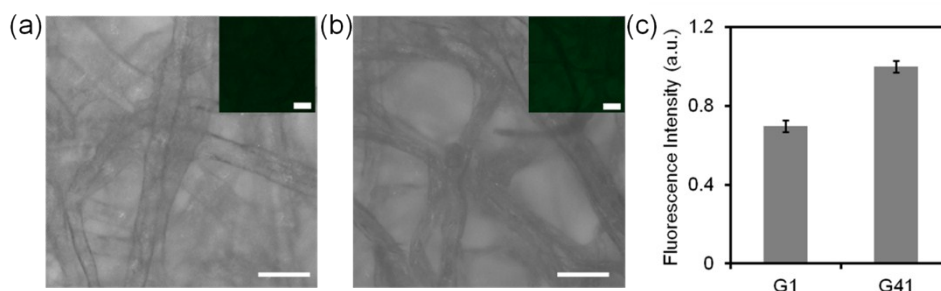

**Figure S1.** Microscopic images of (a) G1 paper and (b) G41 paper under brightfield. Insets show the fluorescence image of G1 and G41 ( $\lambda_{\text{ex}}$ : 488 nm). Scale bar=50  $\mu\text{m}$ . (c) Quantification of fluorescence intensity of G1 and G41. Error bars represent standard error of the mean (n=3).

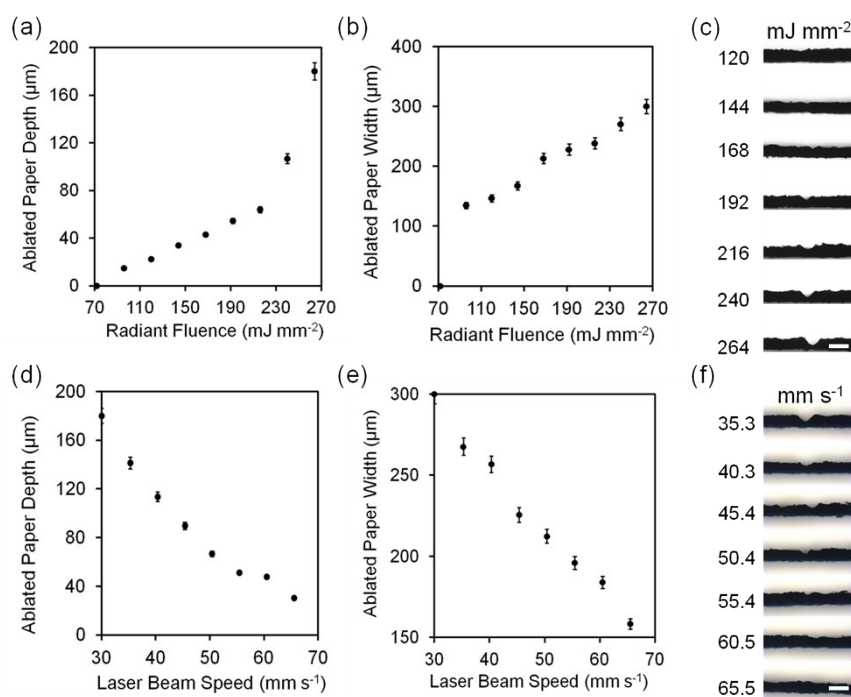

**Figure S2.** Optimization of  $\text{CO}_2$  laser radiation fluence and beam speed for ablating filter paper-G1 (nominal thickness=180  $\mu\text{m}$ ). (a) Depth and (b) width at a constant beam speed (40.3  $\text{mm s}^{-1}$ ). (c) Photographs of laser ablated matrix cross-sections of G1 at a constant beam speed. Scale bar=200  $\mu\text{m}$ . (d) Depth and (e) width of the ablated regions as the laser beam speed was varied at a constant fluence (240  $\text{mJ mm}^{-2}$ ).

2). (f) Photographs of laser ablated matrix cross-sections of G1 matrix at a constant fluence (n=3). Scale bar=200  $\mu\text{m}$ . Error bars represent standard error of the mean (n=3).

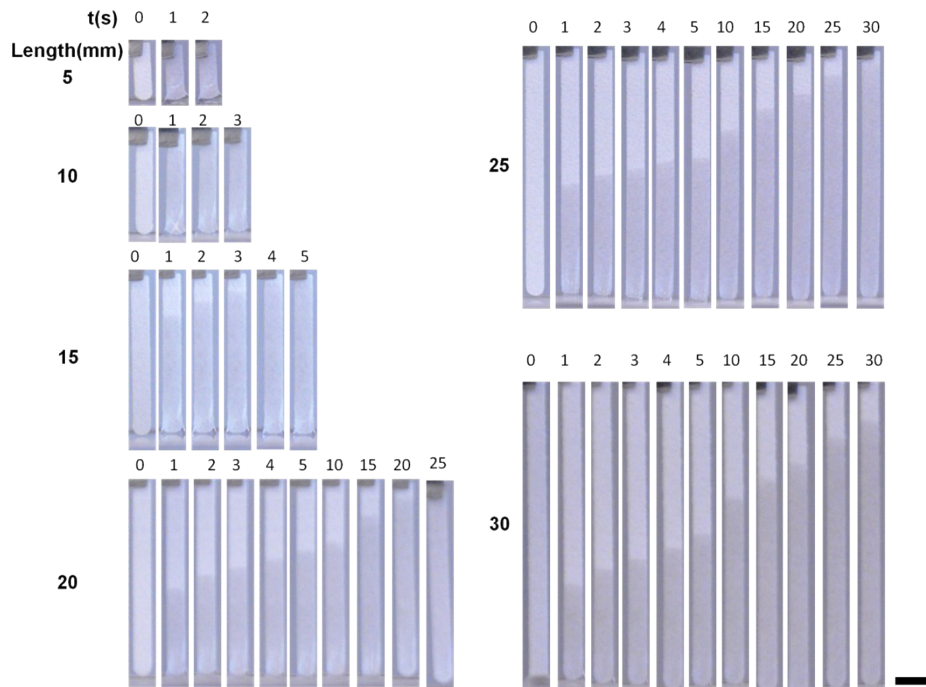

**Figure S3.** Photographs of DI water diffusion on microfluidic channels with different lengths at a constant width (2 mm) at 24 °C. Scale bar=4 mm.

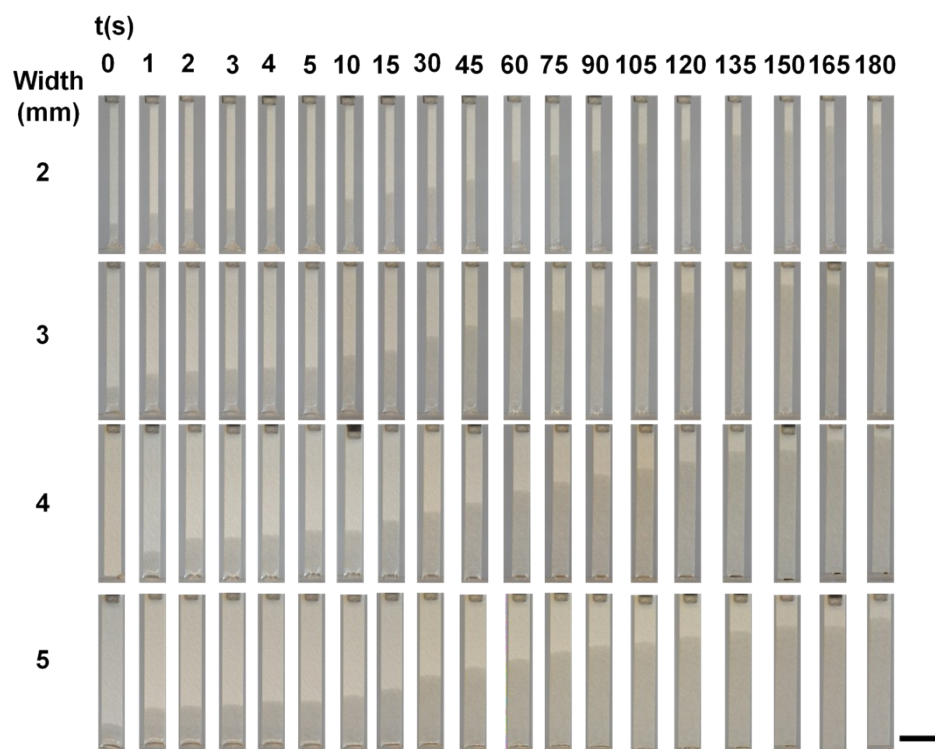

**Figure S4.** Photographs of DI water (20  $\mu\text{L}$ ) diffusion on microfluidic channels with different widths at a constant length (2 mm) at 24  $^{\circ}\text{C}$ . Scale bar=4 mm.

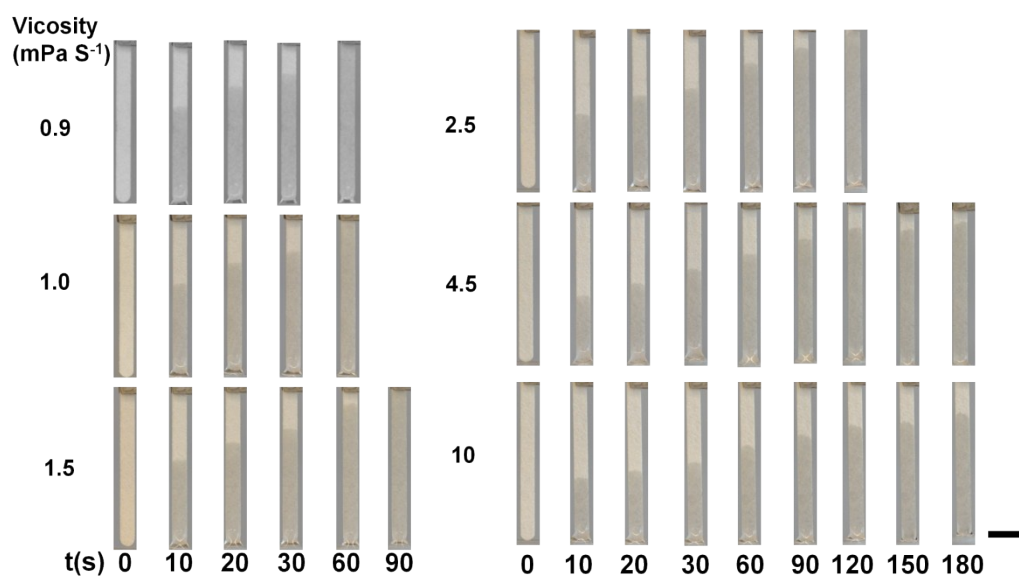

**Figure S5.** Photographs of increase in fluid viscosity from 1.0 to 10.0  $\text{mPa s}^{-1}$  on G1 strip (20 mm  $\times$  2 mm). Scale bar=4 mm.

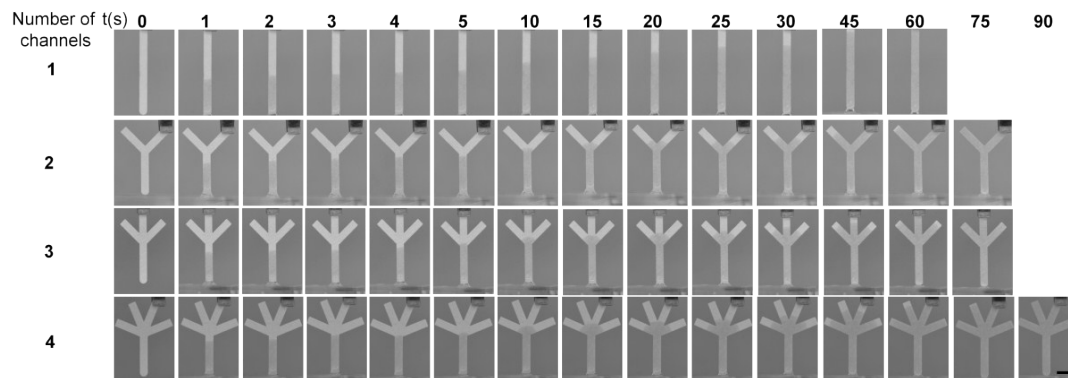

**Figure S6.** Photographs of increase in channels from 1 to 4 on G1matrix. Scale bar=4 mm.

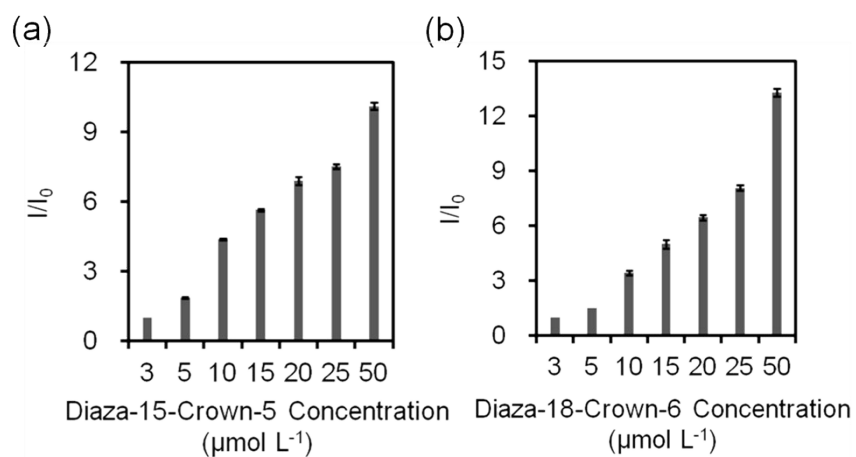

**Figure S7.** Fluorescence intensity readouts of (a) Na<sup>+</sup> and (b) K<sup>+</sup> ions (100 mmol L<sup>-1</sup>) as the concentrations of crown ether derivatives were varied from 3-50 μmol L<sup>-1</sup>. Error bars represent standard error of the mean (n=3).

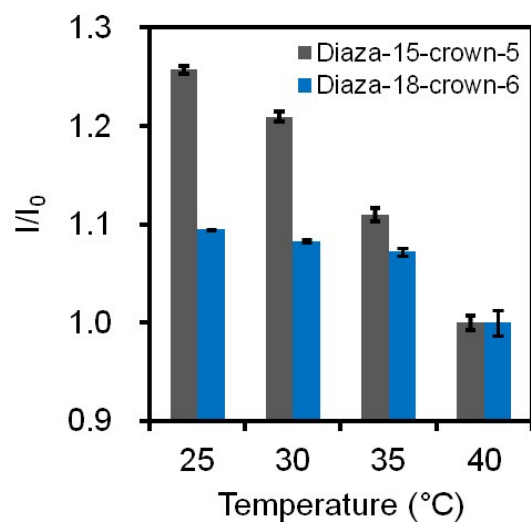

**Figure S8.** The effect of variation in temperature (25 to 40 °C) on fluorescence intensity at a constant ion concentration (100 mmol L<sup>-1</sup>) and Diaza-15-crown-5 and Diaza-18-crown-6 concentration (25 μmol L<sup>-1</sup>). Error bars represent standard error of the mean (n=3).

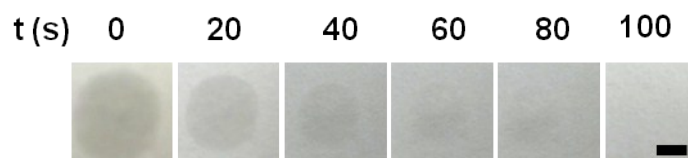

**Figure S9.** Photographs of DMSO (2 μL) on G1 filter paper dried in the air at 24°C. Scale bar=5 mm.

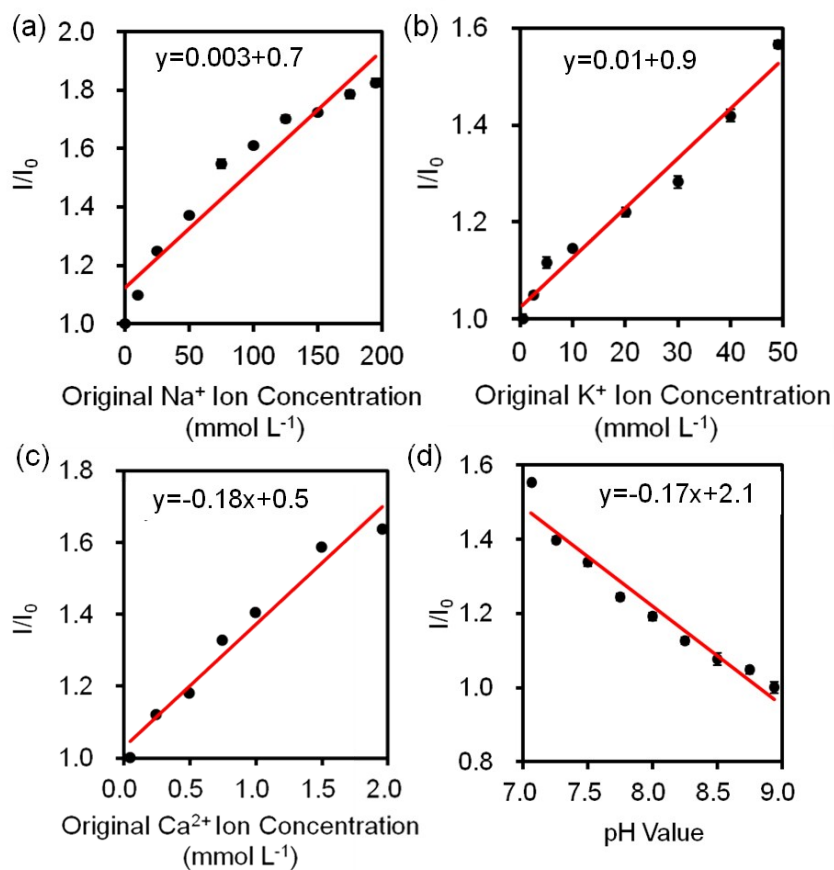

**Figure S10.** Calibration curves of electrolyte sensing on G1 paper using a microplate reader. (a)  $\text{Na}^+$ ; (b)  $\text{K}^+$ ; (c)  $\text{Ca}^{2+}$  ions and (d) pH. Error bars represent standard error of the mean ( $n=6$ ).

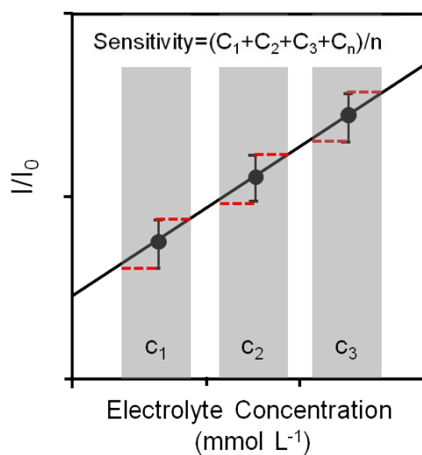

**Figure S11.** Calculation of sensitivity of the fluorescent sensors based on International Union of Pure and Applied Chemistry (IUPAC) guidelines.

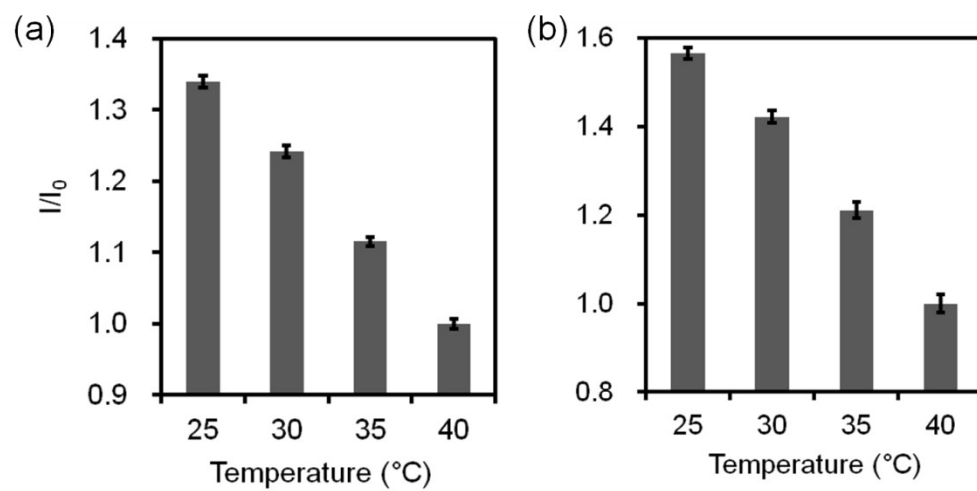

**Figure S12.** The effect of variation in temperature (25°C to 40 °C) on fluorescence intensity of (a) *o*-acetanisidide and (b) seminaphthorhodafluor (25  $\mu\text{mol L}^{-1}$ ) at a constant ion concentration (100  $\text{mmol L}^{-1}$ ). Error bars represent standard error of the mean (n=3).



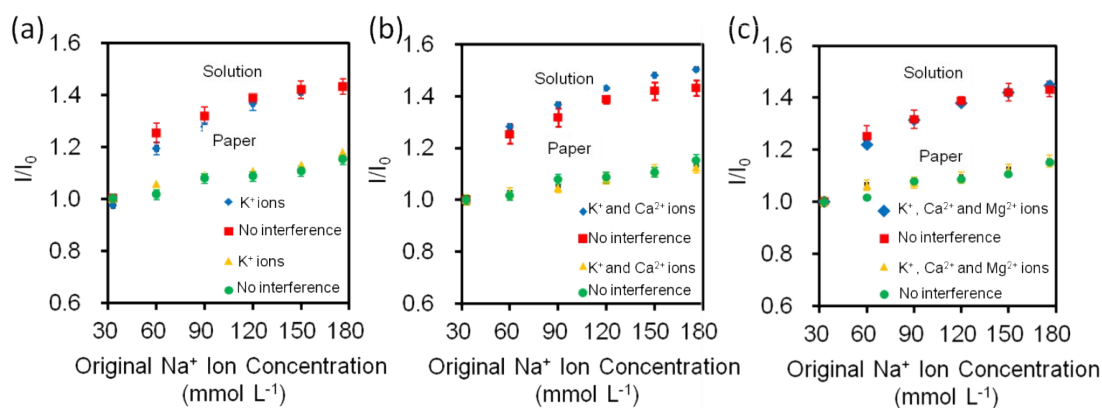

**Figure S13.** Quantifications of  $\text{Na}^+$  ions interference both in buffer solution (Tris, pH 7.4,  $150 \text{ mmol L}^{-1}$ ) and on G1 matrix after dilution at  $24 \text{ }^\circ\text{C}$ . (a)  $\text{Na}^+$  ions sensing in the presence of  $\text{K}^+$  ions at the concentration of  $42 \text{ mmol L}^{-1}$ . (b)  $\text{Na}^+$  ions sensing in the presence of  $\text{K}^+$ ,  $\text{Ca}^{2+}$  at the concentrations of  $42 \text{ mmol L}^{-1}$  and  $1.1 \text{ mmol L}^{-1}$ , respectively. (c)  $\text{Na}^+$  ions sensing in the presence of  $\text{K}^+$ ,  $\text{Ca}^{2+}$  and  $\text{Mg}^{2+}$  at the concentrations of  $42 \text{ mmol L}^{-1}$ ,  $1.1 \text{ mmol L}^{-1}$  and  $0.9 \text{ mmol L}^{-1}$ , respectively. Error bars represent standard error of the mean ( $n=3$ ).

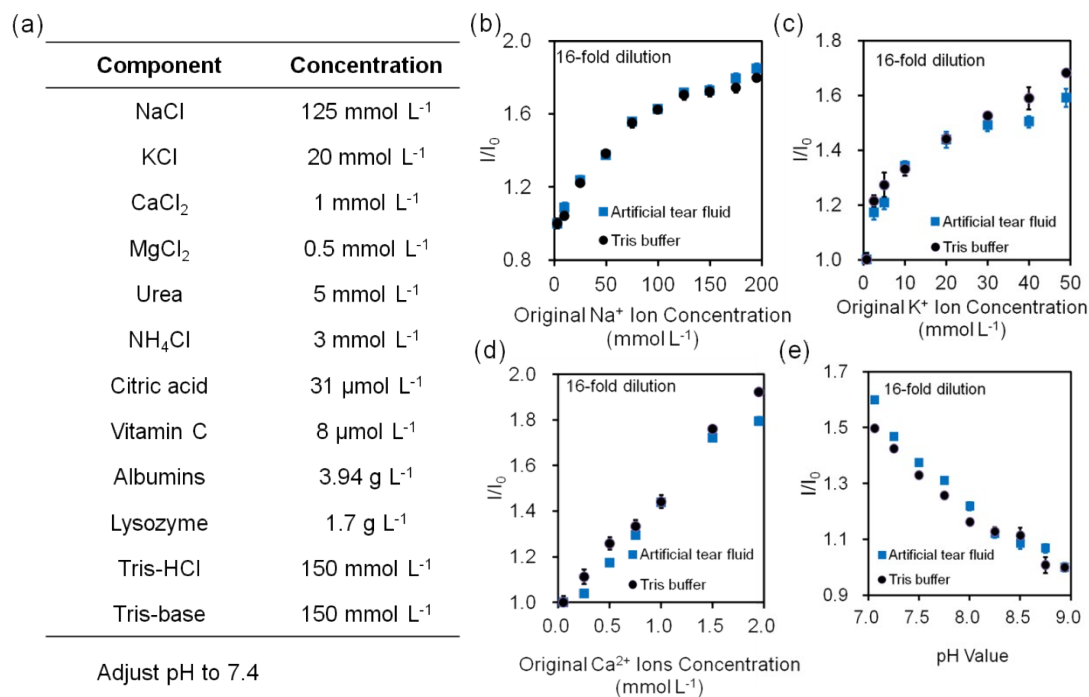

**Figure S14.** Quantification of ions and pH value in 16-fold diluted artificial tear fluid (pH=7.4) and Tris buffer (150 mmol L<sup>-1</sup>) on G1 matrix at 24°C. (a) Composition of artificial tear fluid (pH=7.4); (b) Fluorescence Intensity readouts of Na<sup>+</sup> ions in artificial tear fluid and Tris buffer were varied from ion-free solution to 200 mmol L<sup>-1</sup> at a constant diaza-15-crown-5 concentration (25 μmol L<sup>-1</sup>); (c) Fluorescence Intensity readout of K<sup>+</sup> ions in artificial tear fluid and Tris buffer were varied from ion-free solution to 50 mmol L<sup>-1</sup> at a constant diaza-18-crown-6 concentration (25 μmol L<sup>-1</sup>); (d) Fluorescence Intensity readout of Ca<sup>2+</sup> ions in artificial tear fluid and Tris buffer were varied from ion-free solution to 2.0 mmol L<sup>-1</sup> at a constant o-acetanisidide concentration (25 μmol L<sup>-1</sup>); (e) Fluorescence intensity readout of pH value in Tris buffer were varied from 7.0 to 9.0 at a constant seminapthorhodafluor (25 μmol L<sup>-1</sup>). Error bars represent standard error of the mean (n=3).

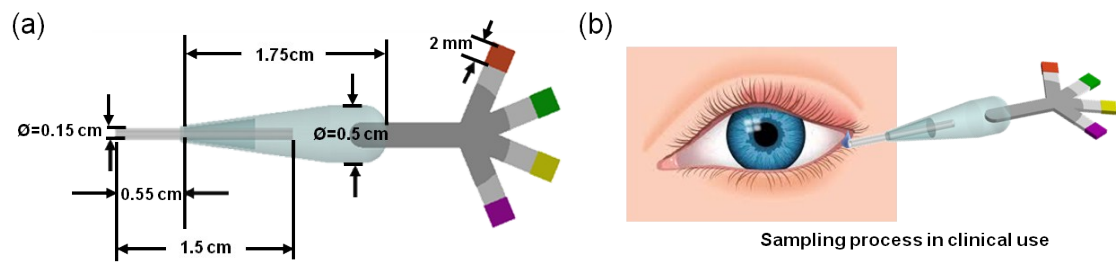

**Figure S15.** The design of the sample collection device and its potential clinical use.

(a) The dimensions of the sample collection device. (b) Envisioned sampling process in clinical use.

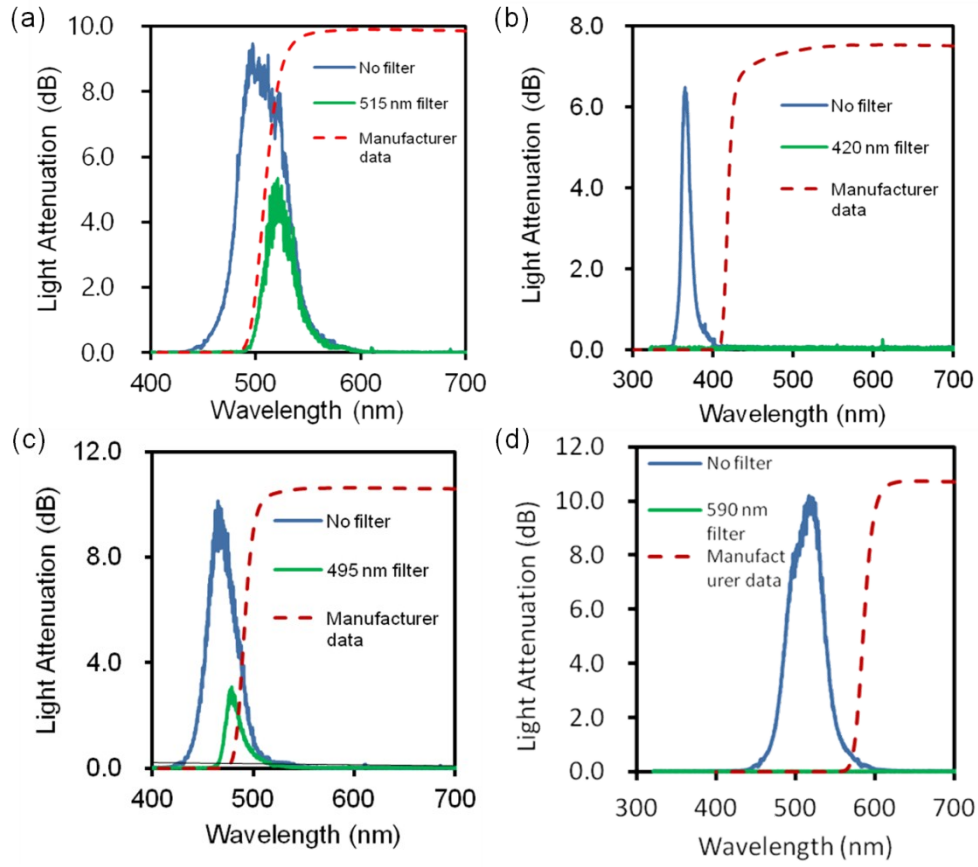

**Figure S16.** Light attenuation of LED lights using optical filters. (a) LED light at emission peak wavelength of 505 nm with 515 nm optical filter; (b) LED light at emission wavelength of 366 nm with 420 nm optical filter; (c) LED light at emission wavelength of 460 nm with 495 nm optical filter; (d) LED light at emission wavelength of 515 nm with 590 nm optical filter.

$$I_m = \frac{I_B + I_s}{I_B + I_o} \quad (\text{Eq. S1})$$

where  $I_m$  is the ratio for background noise subtraction,  $I_B$  is reflection through the filter;  $I_s$  is the emission of the experiment sample;  $I_o$  is the emission of the ion free sample.

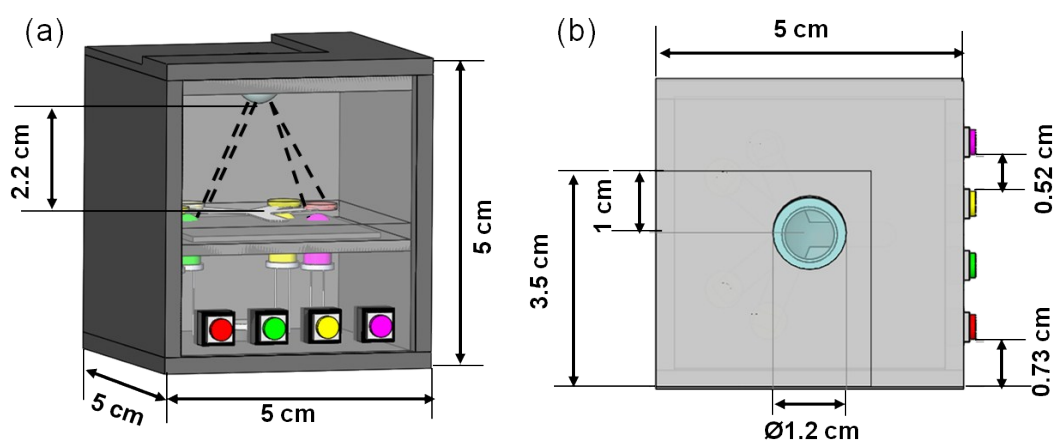

**Figure S17.** The dimensions of the portable readout device. (a) Side view; (b) Top view.

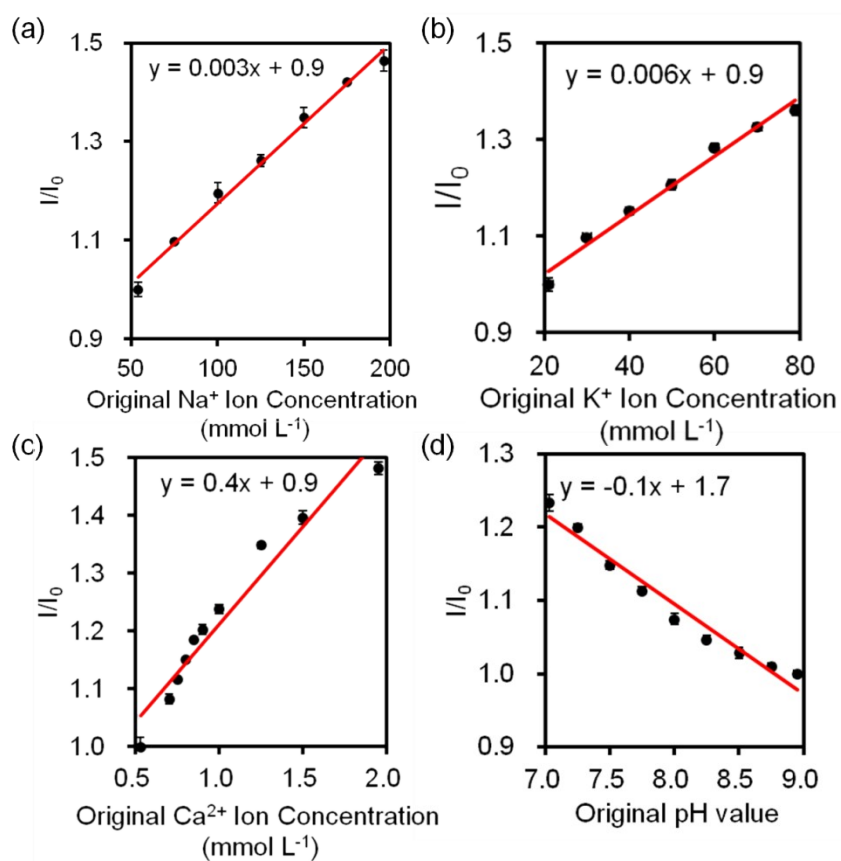

**Figure S18.** Calibration curves of electrolyte sensors using the paper-based microfluidic system: (a) Na<sup>+</sup>, (b) K<sup>+</sup>, (c) Ca<sup>2+</sup> ions, and (d) pH. Error bars represent standard error of the mean (n=6).

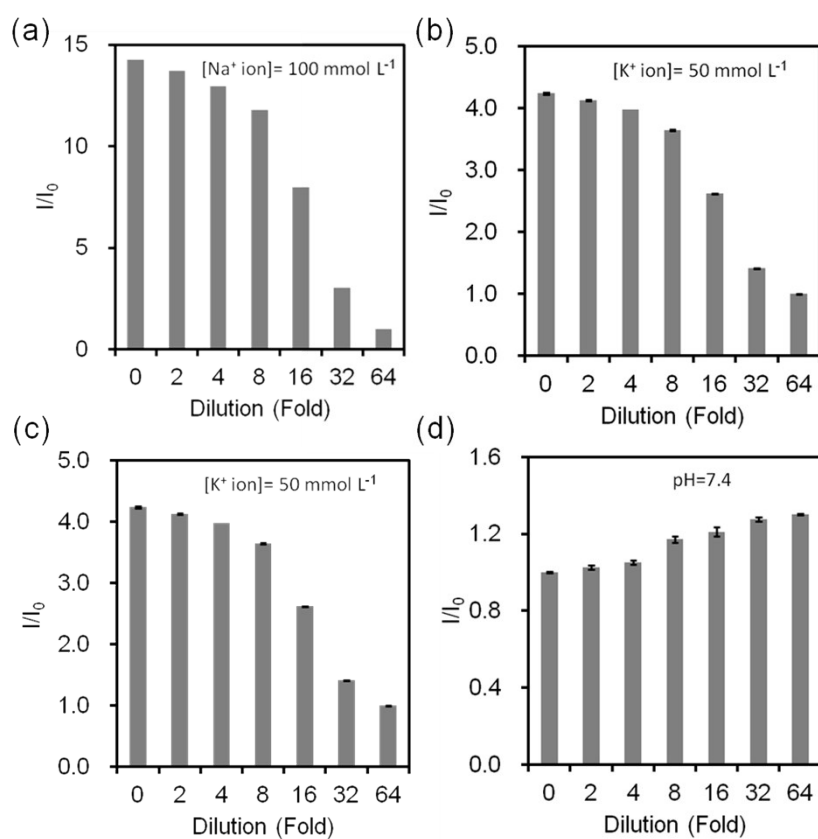

**Figure S19.** Measurement of sample dilution error in the quantification of electrolytes with different dilutions on G1 paper at 24 °C. (a)  $Na^+$  ions solution ( $100 \text{ mmol L}^{-1}$ ); (b)  $K^+$  ions solution ( $50 \text{ mmol L}^{-1}$ ); (c)  $Ca^{2+}$  ions ( $1 \text{ mmol L}^{-1}$ ); (d)  $\text{pH}$  (7.4). Error bars represent standard error of the mean ( $n=3$ ).

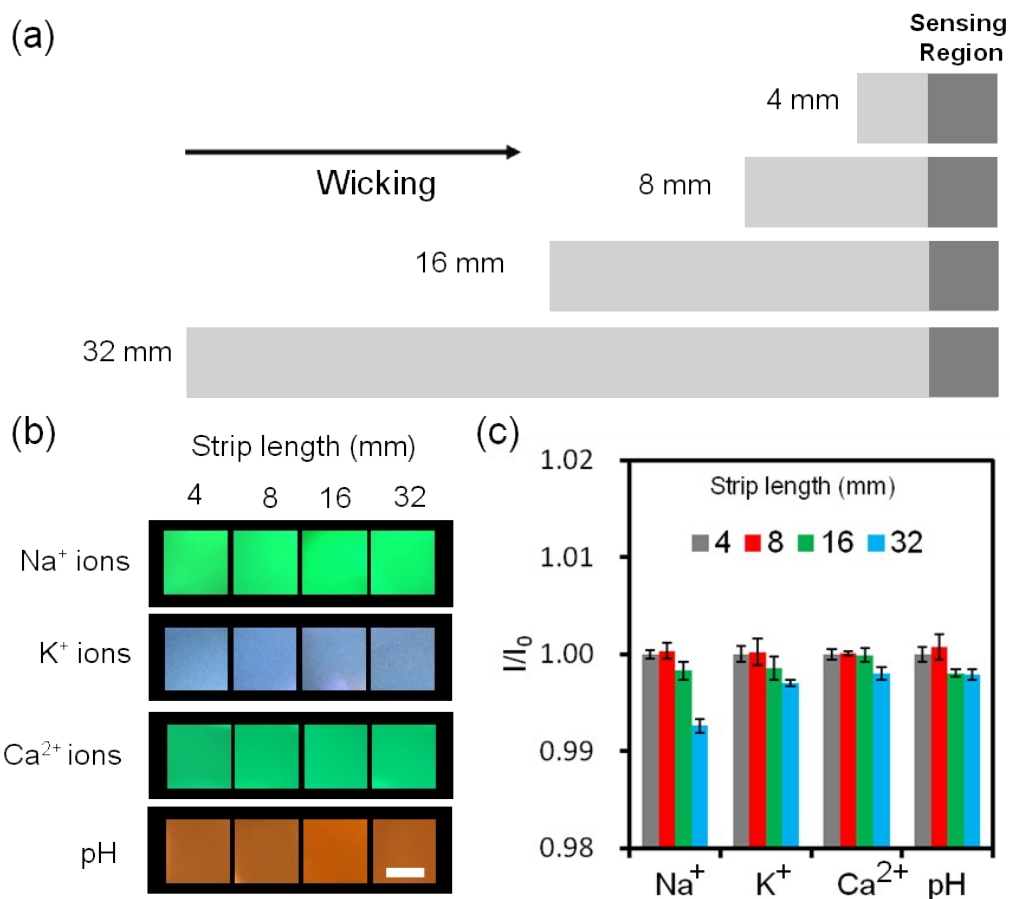

**Figure S20.** Quantifications of evaporation effect on fluorescence intensity measurements. (a) Electrolyte solution wicking on paper strips (width=2 mm) with different lengths (4, 8, 16, and 32 mm). (b) Na<sup>+</sup> ion (100 mmol L<sup>-1</sup>), K<sup>+</sup> ion (50 mmol L<sup>-1</sup>), Ca<sup>2+</sup> ion (1 mmol L<sup>-1</sup>) and pH (Tris solution, pH=7.4) sensing by a smartphone app. Scale bar=2 mm. (c) Electrolyte sensing readouts. Error bars represent standard error of the mean (n=3).

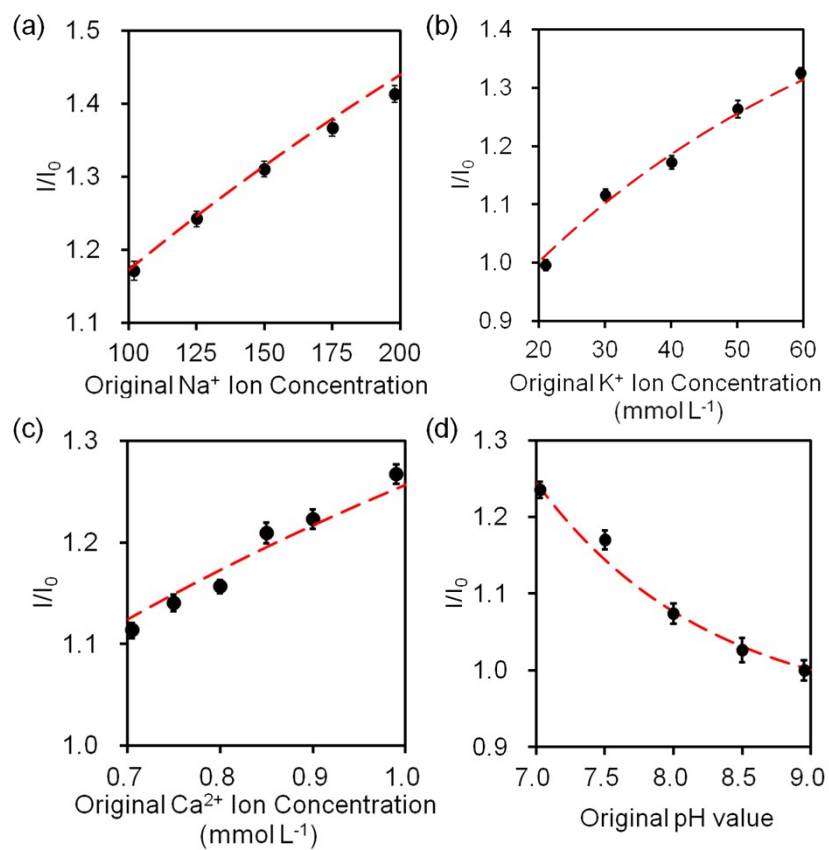

**Figure S21.** Quantification of electrolytes using paper-based microfluidic system in batch-to-batch experiments. (a)  $\text{Na}^+$  ions; (b)  $\text{K}^+$  ions; (c)  $\text{Ca}^{2+}$  ions, and (d) pH. Red dashes show fitted curves in Fig. 7. Error bars represent standard error of the mean ( $n=3$ ).



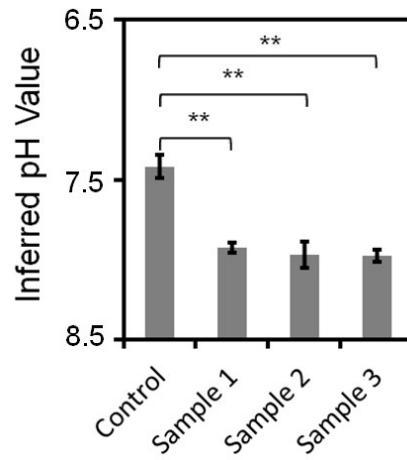

**Figure S22.** Quantitative analysis of simulated artificial tear samples (pH=7.4 as the control and pH=7.9 as the MGD and/or LGD sample) of inferred pH value in the mild stage. Error bars represent standard error of the mean (n=3).
